# Supplementary material
Source: MDPI journal article supplement (https://www.mdpi.com/2073-4352/4/3/404)
Supplement: s1 [file s1]

## Supporting Information



[Explore ▼](#) [Saved Searches ▼](#) [SciPlanner](#)

Substance Identifier "Aliquat HTA-1 " > **substances (1)**

**SUBSTANCES** ?

 **Get References**  **Get Reactions**  **Get Commercial Sources**  **Tools ▼**

**Analyze** **Refine**

Sort by: CAS Registry Number ▼ 

Analyze by: ?  
Substance Role ▼

Properties 1  


Uses 1  


[Show More](#)

☐ ▼ **0 of 1** Substance Selected

☐ 1. **Substance Detail**  
**1166837-27-9**

Substance  
Image  
Cannot Be  
Displayed  
1166837-27-9

 ~2  


Editor Note: An extractant  
**Unspecified**  
Aliquat HTA 1

® = registered trademark of BASF SE

# Aliquat® HTA-1

## Unique High Temperature Resistant Catalyst

### Description

Aliquat HTA-1 is a proprietary, water soluble, quaternary ammonium salt of unique structure. Due to its high water solubility, it can usually be easily removed from the product by water washing.

### Principal uses

Aliquat HTA-1 is designed for those Phase Transfer catalyzed reactions that need to be run at or above 100 °C. Virtually all quaternary ammonium PT catalysts decompose below 100 °C. Aliquat HTA-1 is unique in that it has been found to be stable at temperatures well above 100 °C in some applications. Aliquat HTA-1 is thus ideally suited for cases where the reaction rate is too slow at lower temperatures or where the reaction components require higher temperatures.

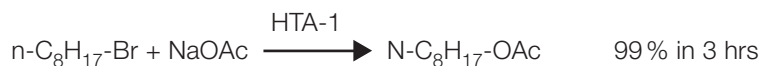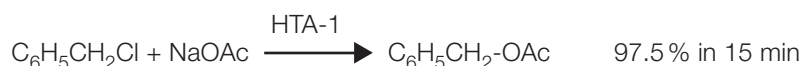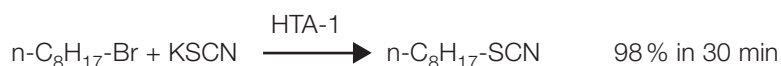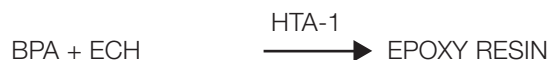

Additionally, HTA-1 can be used for nucleophilic aromatic substitution and other reactions.

### Typical analysis

|                  |       |
|------------------|-------|
| % HTA-1:         | 30–36 |
| % NaCl:          | 10–15 |
| % Water:         | 50–62 |
| Color (Gardner): | ≤5    |

### Shipping & Handling

Aliquat HTA-1 is supplied in 907 kg IBC.

### Technical service

Advice and assistance in the running of laboratory and plant tests is given by representatives of BASF, who are experienced in mineral processing applications.

### Health & Safety

Detailed information on handling and any precautions to be observed in the use of the product(s) described in this leaflet can be found in our relevant health and safety information sheet.

**Note**

The data contained in this publication are based on our current knowledge and experience. In view of the many factors that may affect processing and application of our product, these data do not relieve processors from carrying out their own investigations and tests; neither do these data imply any guarantee of certain properties, nor the suitability of the product for a specific purpose. Any descriptions, drawings, photographs, data, proportions, weights etc. given herein may change without prior information and do not constitute the agreed contractual quality of the product. It is the responsibility of the recipient of our products to ensure that any proprietary rights and existing laws and legislation are observed.

February 2013

# Aliquat®HTA-1

## A Unique High Temperature Resistant Phase Transfer Catalyst

### Description:

**Aliquat HTA-1** is a proprietary, water soluble, quaternary ammonium salt of unique structure. Because of its high water solubility, it can usually be easily removed from the product by water washing.

HTA-1 is designed for those Phase Transfer catalyzed reactions that need to be run at or above 100 degrees Centigrade. Virtually all quaternary ammonium PTC catalysts decompose below 100 degrees Centigrade. Aliquat HTA-1 is unique in that it has been found to be stable at temperatures well above 100 degrees Centigrade in some applications. Aliquat HTA-1 is thus ideally suited for cases where the reaction rate is too slow at lower temperatures or where the reaction components require higher temperatures.

### Typical Analysis:

|               |       |                   |         |
|---------------|-------|-------------------|---------|
| % HTA-1       | 30-36 | % Sodium Chloride | 10-15   |
| % Water       | 50-62 | pH                | 6.0-9.0 |
| Gardner Color | ≤ 5   |                   |         |

## **APPLICATION EXAMPLES:**

### **Aliphatic Displacement:**

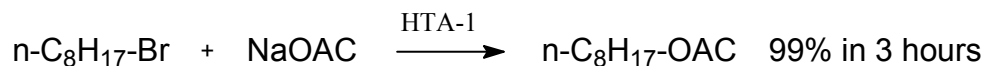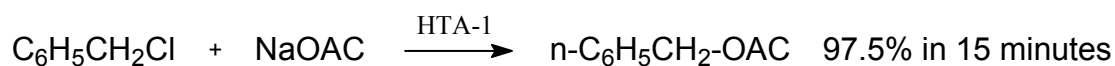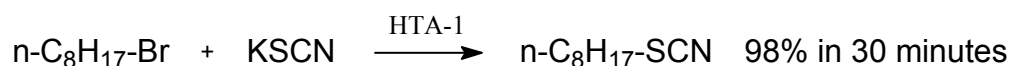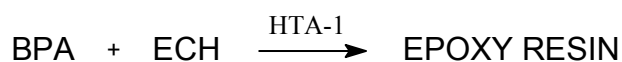

Additionally HTA-1 can be used for nucleophilic aromatic substitution and other reactions. Details on this and the over 60 other patented reactions can be made available on request.

## **Availability:**

Aliquat HTA-1 is available in drum quantities, and five gallon pails and can be supply in bulk by special arrangement.

## **Toxicity:**

Material Safety Data Sheets are available on request.

---

All products in the text marked with an ® are trademarks of the Cognis group.

The information on product specifications provided herein is only binding to the extent confirmed by Cognis in a written Sales Agreement. COGNIS EXPRESSLY DISCLAIMS ANY RESPONSIBILITY FOR THE SUITABILITY OF THE PRODUCTS FOR ANY SPECIFIC OR PARTICULAR PURPOSES INTENDED BY THE USER. Suggestions for the use and application of the products and guide formulations are given for information purposes only and without commitment. Such suggestions do not release Cognis' customers from testing the products as to their suitability for the customer's intended processes and purposes. Cognis does not assume any liability or risk involved in the use of its products as the conditions of use are beyond its control. The user of the products is solely responsible for compliance with all laws and regulations applying to the use of the products, including intellectual property rights of third parties.

**Cognis Corporation Ion-Transfer Technology**

**Aliquat®HTA-1**
